# Supplementary material for: Intragenomic variability and extended sequence patterns in the mutational signature of ultraviolet light
Source: PubMed Central journal article supplement — Proc Natl Acad Sci U S A. 2019 Sep 23;116(41):20411–7. doi: 10.1073/pnas.1909021116 (PMC6789905; doi:10.1073/pnas.1909021116), 2019-09-23
Supplement: pnas.1909021116.sapp.pdf [file pnas.1909021116.sapp.pdf]

# PNAS

[www.pnas.org](http://www.pnas.org)

Supplementary Information for

Intragenomic variability and extended sequence patterns in the mutational signature of ultraviolet light

Markus Lindberg, Martin Boström, Kerryn Elliott, Erik Larsson

Erik Larsson

Email: [erik.larsson@gu.se](mailto:erik.larsson@gu.se)

**This PDF file includes:**

Figures S1 to S6  
Tables S1 to S2  
SI References

**Other supplementary materials for this manuscript include the following:**

None

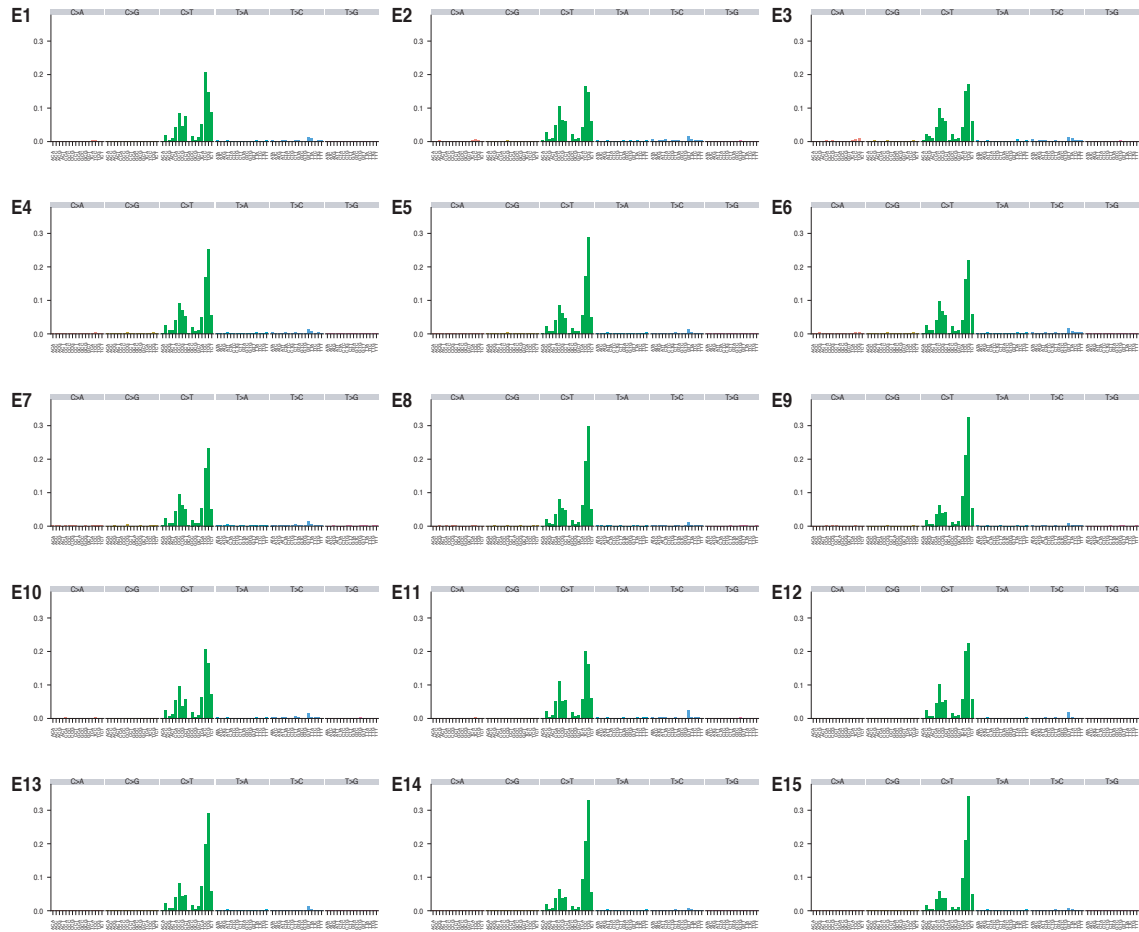

**Fig. S1.** UV trinucleotide signature in different ChromHMM chromatin states. The signatures were normalized for variable trinucleotide sequence content in the respective regions and further normalized to sum up to one. Each bar thus shows the probability of mutagenesis at a given trinucleotide in relative terms, compared to other trinucleotides.

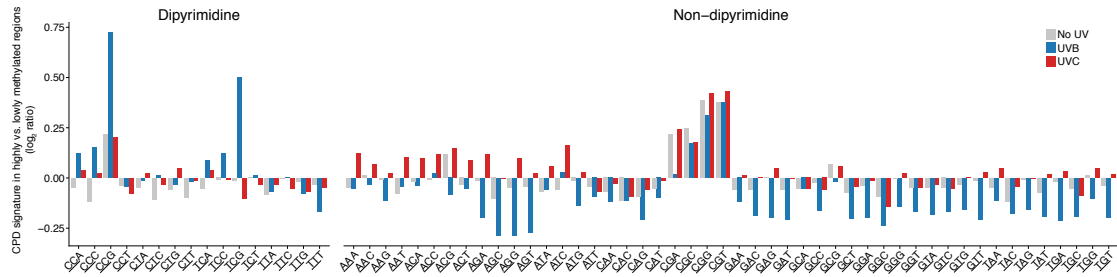

**Fig. S2.** CPD formation signature in highly vs. lowly methylated genomic regions. The CPD trinucleotide signature (relative formation frequency per genomic site) in highly (>80% CpG methylation) vs. lowly (>20% CpG methylation) methylated regions (1 kb genomic bins) were compared by means of a  $\log_2$  ratio, confirming methylation-dependent elevation in CPD formation at CpG-flanking dipyrimidines specifically in response to UVB (blue). Examined patterns include all trinucleotides, where the first two bases (underscored) represent the position at which a CPD was detected. Notably, CPD detections at CG dinucleotides, which cannot form CPDs and thus represent false positives, were found to be methylation-dependent. Although frequencies for these events were low compared to actual CPD-forming dipyrimidines (**Fig. 4**), such detections were observed in all conditions including no-UV-controls, suggesting occasional cleavage by T4 endonuclease V at methylated CpGs independently of CPD formation. Signatures were normalized with respect to genomic sequence content in the respective regions and further normalized to sum to one. Trinucleotides are presented in alphabetical order, separated by CPD-forming and non-CPD-forming patterns. Results for UVB, UVC and no UV controls, all pooled, are shown as separate bars.

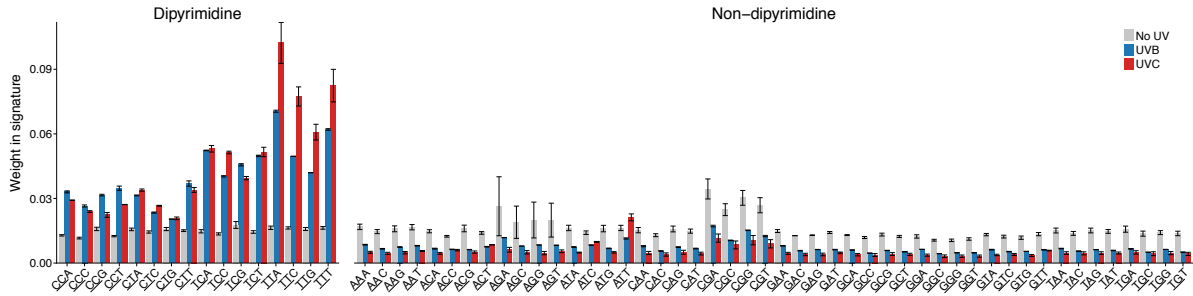

**Fig. S3.** Genome-wide CPD trinucleotide signature for UVB and UVC. Examined patterns include all trinucleotides, where the first two bases (underscored) represent the position at which a CPD was detected. Signatures were normalized with respect to genomic sequence content in the respective regions and further normalized to sum to one. Trinucleotides are presented in alphabetical order, separated by CPD-forming and non-CPD-forming patterns. Results for UVB, UVC and no UV controls, are shown, and error bars indicate SD ( $n = 2$ ).

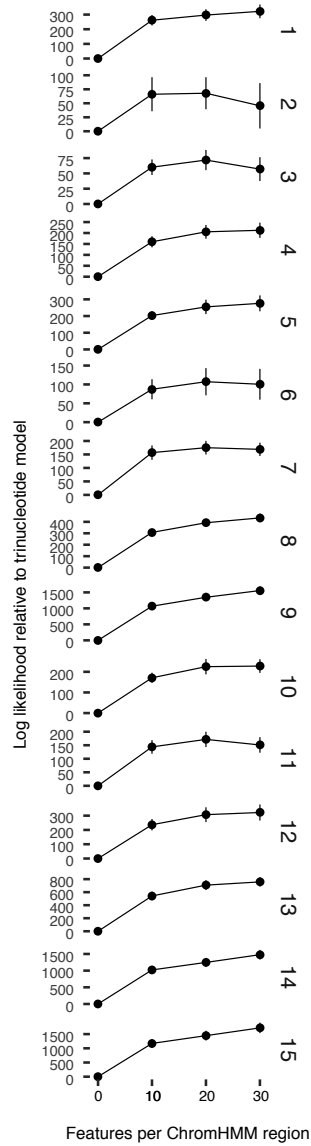

**Fig. S4.** Likelihood of observed mutation data for the extended signature model as a function of the number of long pentamer features. The x-axis indicates the number of pentamer features contributed from each ChromHMM region during feature selection, which was performed using Fisher's exact test on 500 kb random subsets of cytosine positions in each region. Selected features from each region (top ranking positive or negatively associated motifs) were pooled into one final set used for training models using logistic regression. This was repeated 10 times for each region on separate 500 kb random subsets. For each model, the likelihood was evaluated based on observed mutation data in a separate random 500 kb subset. Error bars indicate standard deviation.

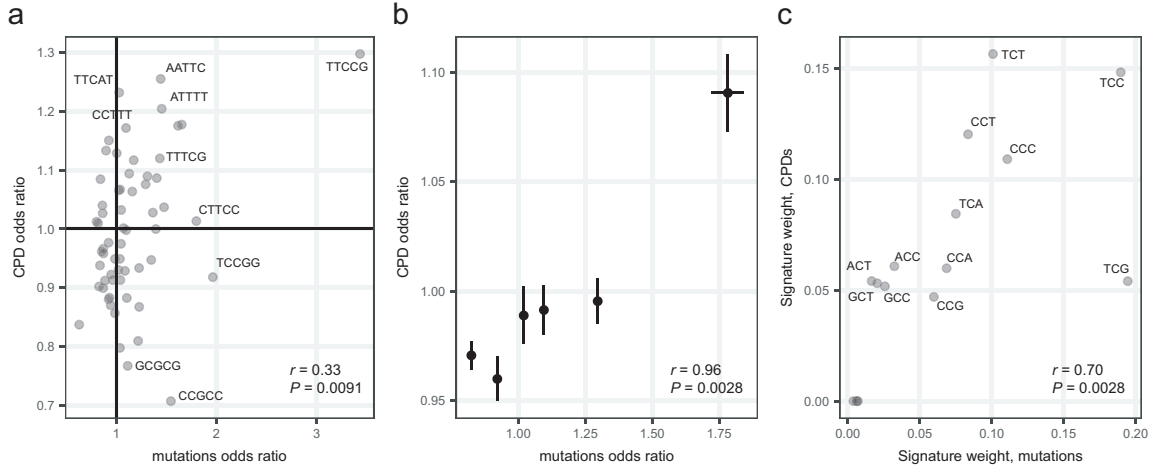

**Fig. S5.** Evaluation of extended signature patterns in relation to UVB CPD data. The same logistic regression model used for mutations was applied to UVB CPD data, using the same set of features including trinucleotides. This allows for evaluation of CPD formation frequencies at cytosines in relation to the uncovered pentamer signature patterns, while compensating for the effect of the central trinucleotide. For each position in the genome, we first determined whether it overlapped with a detected CPD or not, thus providing a binary variable for regression similar to the mutational analysis. Only cytosines were considered, as the mutational analysis was restricted to C>T transitions. **(a)** Scatter plot comparing regression weights (odds ratios) for mutations (x-axis) and CPDs (y-axis) for pentamer contextual patterns in the E1 region. **(b)** Results from panel a binned along the x-axis (10 patterns in bins 1-5 and 11 patterns in bin 6). **(c)** Same comparison for trinucleotides. The trinucleotide weights are shown as normalized frequencies summing to one for consistency with other figures. Note that, for trinucleotides consisting purely of pyrimidines, CPDs can form in two positions overlapping with the central position, thus elevating the CPD frequencies for such patterns. Pearson's correlation coefficient is indicated in all panels.

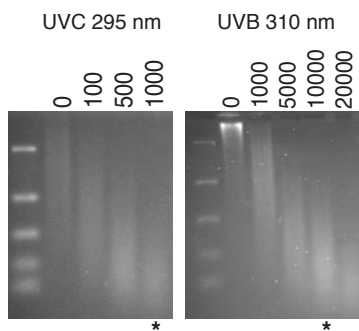

**Fig. S6.** T4 endonuclease digestion of DNA treated with different doses of UV light. To ensure that CPDs were generated at similar frequencies compared to previously generated UVC data (1), A375 cells were treated with a range of UVC (295nm) and UVB (310 nm) doses. DNA was extracted using the QIAgen Blood Mini kit, and 1  $\mu\text{g}$  of DNA was digested with T4 endonuclease V (NEB). DNA was next purified by phenol/chloroform extraction and ethanol precipitation. DNA was resuspended in alkaline sample buffer and run overnight on a 1% alkaline gel. A UVB dose of 10,000  $\text{J}/\text{m}^2$  was judged to be appropriate, as indicated by the asterisks.

**Table S1.** List of included samples.

| <b>ID</b> | <b>SNV burden</b> | <b>C&gt;T burden</b> | <b>DiPy C&gt;T burden</b> |
|-----------|-------------------|----------------------|---------------------------|
| SP124298  | 375872            | 328020               | 326512                    |
| SP124307  | 110715            | 97493                | 96979                     |
| SP124305  | 48660             | 41560                | 41115                     |
| SP124302  | 51460             | 44647                | 44420                     |
| SP124316  | 79306             | 68376                | 67951                     |
| SP124319  | 192274            | 173702               | 173261                    |
| SP124326  | 60559             | 52013                | 51430                     |
| SP124329  | 14895             | 12258                | 12049                     |
| SP124333  | 46788             | 38341                | 37735                     |
| SP124334  | 66789             | 56477                | 56006                     |
| SP124362  | 221175            | 200047               | 199236                    |
| SP124364  | 107422            | 90236                | 89494                     |
| SP124396  | 48407             | 40024                | 39322                     |
| SP124409  | 248586            | 222953               | 221924                    |
| SP124372  | 102774            | 87696                | 86749                     |
| SP124415  | 565302            | 500498               | 499653                    |
| SP124386  | 119838            | 106509               | 105606                    |
| SP124365  | 75874             | 62115                | 61388                     |
| SP124367  | 85946             | 74177                | 73867                     |
| SP124369  | 145545            | 128208               | 127448                    |
| SP124376  | 57466             | 50903                | 50377                     |
| SP124377  | 52806             | 43880                | 43549                     |
| SP124380  | 154507            | 133439               | 132809                    |
| SP124382  | 409281            | 345158               | 343586                    |
| SP124389  | 72622             | 65421                | 65077                     |
| SP124394  | 109490            | 98231                | 97791                     |
| SP124399  | 145632            | 124018               | 123274                    |
| SP124401  | 439770            | 378966               | 377151                    |
| SP124406  | 74238             | 61167                | 60644                     |
| SP124412  | 66924             | 54735                | 54181                     |
| SP124418  | 104129            | 86645                | 86155                     |
| SP124420  | 72313             | 63554                | 62991                     |
| SP124423  | 18566             | 16585                | 16474                     |
| SP124425  | 42697             | 35404                | 35043                     |
| SP124428  | 14706             | 13361                | 13308                     |
| SP124431  | 95459             | 78943                | 78439                     |
| SP124434  | 87746             | 76141                | 75448                     |



|          |        |        |        |
|----------|--------|--------|--------|
| SP124439 | 330466 | 289757 | 288958 |
| SP124447 | 459049 | 388059 | 386208 |
| SP124449 | 142725 | 125412 | 124643 |
| SP124452 | 91282  | 79265  | 78647  |
| SP124454 | 59772  | 52023  | 51351  |
| SP124456 | 46832  | 39493  | 38852  |
| SP124458 | 169152 | 145097 | 144143 |
| SP124460 | 170162 | 148367 | 147636 |
| SP124462 | 118149 | 101868 | 101143 |
| SP128037 | 761170 | 645515 | 642748 |
| SP128069 | 23049  | 19368  | 18992  |
| SP128085 | 16114  | 14156  | 14026  |
| SP128089 | 60373  | 50257  | 49865  |
| SP128094 | 183745 | 156860 | 156147 |
| SP128097 | 51435  | 41674  | 41429  |
| SP128114 | 209183 | 187732 | 186779 |
| SP128129 | 33547  | 27927  | 27755  |
| SP128137 | 73502  | 63340  | 62863  |
| SP128146 | 94098  | 84680  | 84088  |
| SP128150 | 192559 | 160519 | 159364 |
| SP128166 | 43438  | 35242  | 34928  |
| SP128172 | 86790  | 75994  | 75539  |
| SP128182 | 339573 | 304819 | 303894 |
| SP128191 | 29781  | 25109  | 24698  |
| SP128316 | 42559  | 36197  | 35871  |
| SP128330 | 103243 | 85940  | 85339  |
| SP128340 | 32093  | 28107  | 27716  |
| SP128347 | 97035  | 82379  | 81724  |
| SP128351 | 69140  | 57618  | 56892  |
| SP128363 | 95795  | 83346  | 82693  |
| SP128372 | 164529 | 144904 | 144170 |
| SP128381 | 90008  | 76821  | 76413  |
| SP128393 | 92006  | 76920  | 76249  |
| SP128404 | 113589 | 95515  | 94972  |
| SP128413 | 170401 | 150100 | 149477 |
| SP128423 | 68195  | 59671  | 59135  |
| SP128429 | 36128  | 30071  | 29625  |
| SP128438 | 103894 | 91660  | 90944  |
| SP128448 | 56935  | 49677  | 49247  |

|                  |        |        |        |
|------------------|--------|--------|--------|
| SP128469         | 85080  | 72552  | 71989  |
| SP128484         | 73541  | 66806  | 66250  |
| SP128521         | 236611 | 202393 | 201537 |
| SP128529         | 335628 | 297244 | 296405 |
| SP128572         | 60320  | 52588  | 52238  |
| SP128601         | 28061  | 22919  | 22555  |
| SP128608         | 535940 | 478552 | 477506 |
| SP128616         | 72620  | 62907  | 62490  |
| SP128625         | 71958  | 61173  | 60693  |
| SP128639         | 277301 | 239370 | 238258 |
| SP128642         | 145958 | 127149 | 126050 |
| SP128658         | 383889 | 350003 | 349149 |
| SP128672         | 37585  | 31499  | 31131  |
| SP128678         | 357369 | 324947 | 324053 |
| SP128705         | 105739 | 94414  | 93651  |
| SP128718         | 123161 | 105508 | 104859 |
| SP128751         | 122230 | 104344 | 103525 |
| SP128774         | 684506 | 589170 | 587084 |
| SP128799         | 79382  | 71070  | 70478  |
| SP128818         | 50213  | 45203  | 44834  |
| SP128829         | 65104  | 54760  | 54381  |
| SP128843         | 289461 | 244352 | 243101 |
| SP128868         | 125260 | 108471 | 108011 |
| SP128873         | 33829  | 29310  | 28868  |
| SP128900         | 319351 | 282071 | 280887 |
| SP129103         | 617593 | 508336 | 506825 |
| SP129146         | 134365 | 114803 | 113922 |
| SP129177         | 360487 | 319829 | 318595 |
| SP129208         | 793951 | 732843 | 731349 |
| SP129215         | 322291 | 278797 | 277416 |
| SP129230         | 92693  | 80774  | 80266  |
| SP129257         | 26431  | 23905  | 23633  |
| SP129272         | 25284  | 20908  | 20584  |
| SP129287         | 19258  | 16290  | 16136  |
| TCGA-DA-A1HV-06A | 269316 | 238306 | 237372 |
| TCGA-DA-A1HW-06A | 55586  | 46893  | 46461  |
| TCGA-DA-A1HY-06A | 119232 | 101543 | 100976 |
| TCGA-DA-A1I0-06A | 93147  | 81155  | 80571  |
| TCGA-DA-A1IC-06A | 136929 | 113854 | 112997 |

|                  |        |        |        |
|------------------|--------|--------|--------|
| TCGA-DA-A3F3-06A | 46865  | 39305  | 38744  |
| TCGA-DA-A3F8-06A | 174706 | 159515 | 158876 |
| TCGA-EE-A29B-06A | 94411  | 79783  | 79150  |
| TCGA-EE-A2A0-06A | 45784  | 38869  | 38432  |
| TCGA-EE-A2GN-06A | 59230  | 51518  | 51028  |
| TCGA-EE-A2GT-06A | 57712  | 47891  | 47335  |
| TCGA-EE-A2MI-06A | 218967 | 196452 | 195616 |
| TCGA-EE-A3JI-06A | 156660 | 132750 | 131884 |
| TCGA-ER-A19D-06A | 72730  | 61646  | 61040  |
| TCGA-ER-A19J-06A | 45522  | 38639  | 37964  |
| TCGA-FS-A1ZK-06A | 194311 | 163495 | 162407 |
| TCGA-FS-A1ZP-06A | 91622  | 82002  | 81533  |
| TCGA-GN-A262-06A | 58752  | 48985  | 48501  |
| TCGA-GN-A266-06A | 613758 | 537374 | 536353 |
| TCGA-GN-A26A-06A | 49463  | 41429  | 40982  |

**Table S2.** Oligonucleotide sequences for CPD-seq. Illumina *P5* and *P7* adapters are indicated underlined and italicized respectively, and **indexes** are shown in bold and underline. Oligo 5' modifications are also indicated. All oligos were from Integrated DNA technologies (Coralville, IA).

| Primers    | Sequence                                                                                       |
|------------|------------------------------------------------------------------------------------------------|
| ARC141/142 | 5'-GTGACTGGAGTTCAGACGTGTGCTCTTCCGATCT*T-3'                                                     |
|            | 5'-/5Phos/AGATCGGAAGAGCACACGTCTGAACTCCAGTCAC/3AmMO/-3'                                         |
| ARC143/144 | 5'-/5Biosg/ACACTCTTTCCCTACACGACGCTCTTCCGATCTNNNNNN/3AmMO/-3'                                   |
|            | 5'-/5Phos/AGATCGGAAGAGCGTCGTGTAGGGAAAGAGTGT/3AmMO/-3'                                          |
| ARC154     | 5'-ACACTCTTTCCCTACACGACGCTCTTCCGATCT-3'                                                        |
| ARC49      | 5'- <u>AATGATACGGCGACCACCGAGATCT</u> ACACTCTTTCCCTACACGACGCTCTTCCGATCT-3'                      |
| ARC78      | 5'- <i>CAAGCAGAAGACGGCATACGAGAT</i> <b><u>CGTGAT</u></b> GTGACTGGAGTTCAGACGTGTGCTCTTCCGATCT-3' |
| ARC87      | 5'- <i>CAAGCAGAAGACGGCATACGAGAT</i> <b><u>CACTGT</u></b> GTGACTGGAGTTCAGACGTGTGCTCTTCCGATCT-3' |
| ARC88      | 5'- <i>CAAGCAGAAGACGGCATACGAGAT</i> <b><u>ATTGGC</u></b> GTGACTGGAGTTCAGACGTGTGCTCTTCCGATCT-3' |

## References

1. K. Elliott *et al.*, Elevated pyrimidine dimer formation at distinct genomic bases underlies promoter mutation hotspots in UV-exposed cancers. *PLoS Genet* **14**, e1007849 (2018).
